# Supplementary material
Source: Springer Nature journal article supplement (https://www.springermedizin.de/resource/supplementary/12906_2010_367_MOESM2_ESM.pdf/9519806)

Spleen (A)

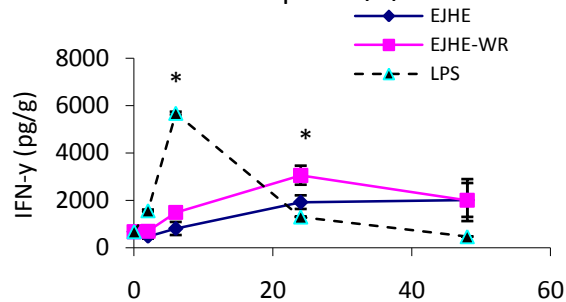

Blood (B)

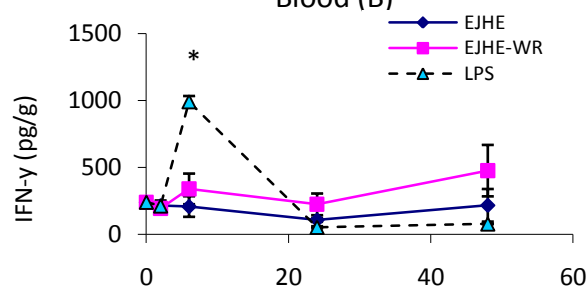

Lungs (C)

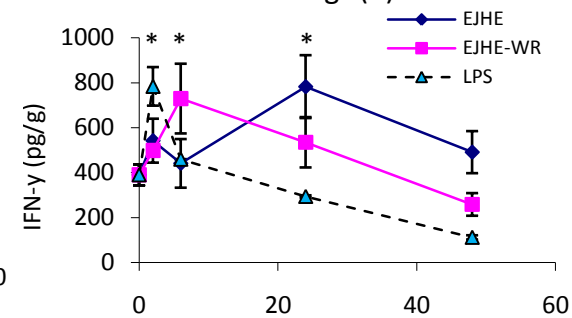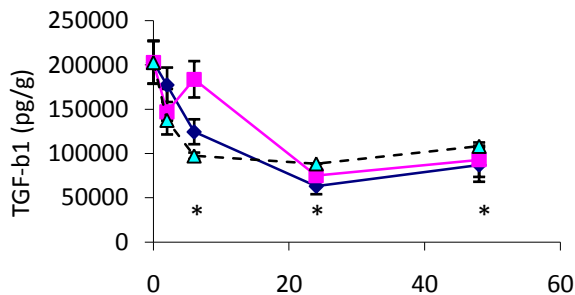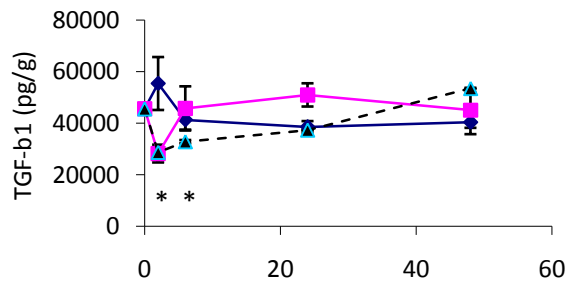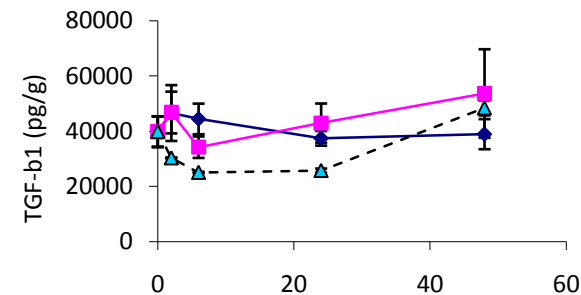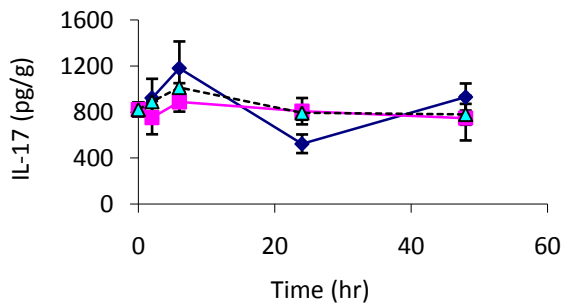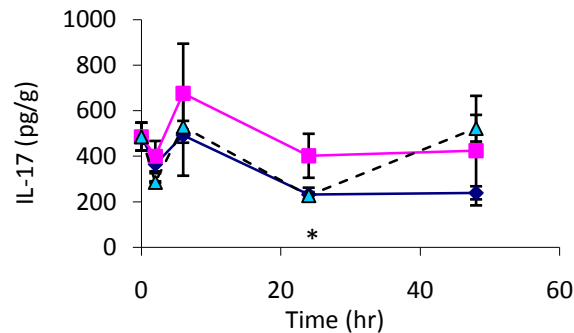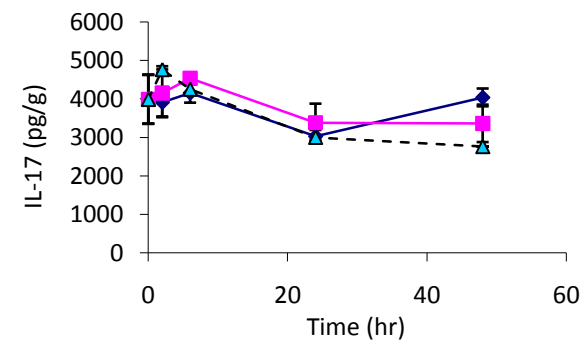

Supplement: MOESM2 [file 9519806]
